# Supplementary material for: (-)-Oleocanthal Nutraceuticals for Alzheimer’s Disease Amyloid Pathology: Novel Oral Formulations, Therapeutic, and Molecular Insights in 5xFAD Transgenic Mice Model
Source: MDPI journal article supplement (doi:10.3390/nu13051702), 2021-05-18
Supplement: s1 [file s1]

## Research Article

## Supporting Information

# (-)-Oleocanthal Nutraceuticals for Alzheimer's Disease Amyloid Pathology: Novel Oral Formulations, Therapeutic, and Molecular Insights in 5xFAD Transgenic Mice Model

Afsana Tajmim,<sup>1</sup> Areli K. Cuevas-Ocampo,<sup>2</sup> Abu Bakar Siddique,<sup>1</sup> Mohammad Qusa,<sup>1</sup> Judy Ann King,<sup>2</sup> Khaldoun S. Abdewahed,<sup>1</sup> Jafrin Jobayer Sonju,<sup>1</sup> and Khalid A. El Sayed<sup>1,\*</sup>

<sup>1</sup> School of Basic Pharmaceutical and Toxicological Sciences, College of Pharmacy, University of Louisiana at Monroe, 1800 Bienville Drive, Monroe, LA 71201, USA; [tajmima@warhawks.ulm.edu](mailto:tajmima@warhawks.ulm.edu) (A.T.); [siddique@ulm.edu](mailto:siddique@ulm.edu) (A.B.S.); [gusamh@warhawks.ulm.edu](mailto:gusamh@warhawks.ulm.edu) (M.Q.); [abdelwks@warhawks.ulm.edu](mailto:abdelwks@warhawks.ulm.edu) (K.A.W.); [sonjujj@warhawks.ulm.edu](mailto:sonjujj@warhawks.ulm.edu) (J.J.S.); [elsayed@ulm.edu](mailto:elsayed@ulm.edu) (K.A.E.S.)

<sup>2</sup> Department of Pathology and Translational Pathobiology, LSU Health Shreveport, 1501 Kings Highway, Shreveport, LA, 71103, USA; [acueva@lsuhsc.edu](mailto:acueva@lsuhsc.edu) (A.K.C.O.); [jkin12@lsuhsc.edu](mailto:jkin12@lsuhsc.edu) (J.K.)

\* Correspondence: [elsayed@ulm.edu](mailto:elsayed@ulm.edu); Tel.: +1-318-342-1725

**Citation:** Lastname, F.; Lastname, F.; Last-name, F. Title. *Nutrients* **2021**, *13*, 1702.  
<https://doi.org/10.3390/nu13051702>

Received: date  
Accepted: date  
Published: 18 May 2021

**Publisher's Note:** MDPI stays neutral with regard to jurisdictional claims in published maps and institutional affiliations.

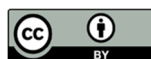

**Copyright:** © 2021 by the author. Licensee MDPI, Basel, Switzerland. This article is an open access article distributed under the terms and conditions of the Creative Commons Attribution (CC BY) license (<http://creativecommons.org/licenses/by/4.0/>).

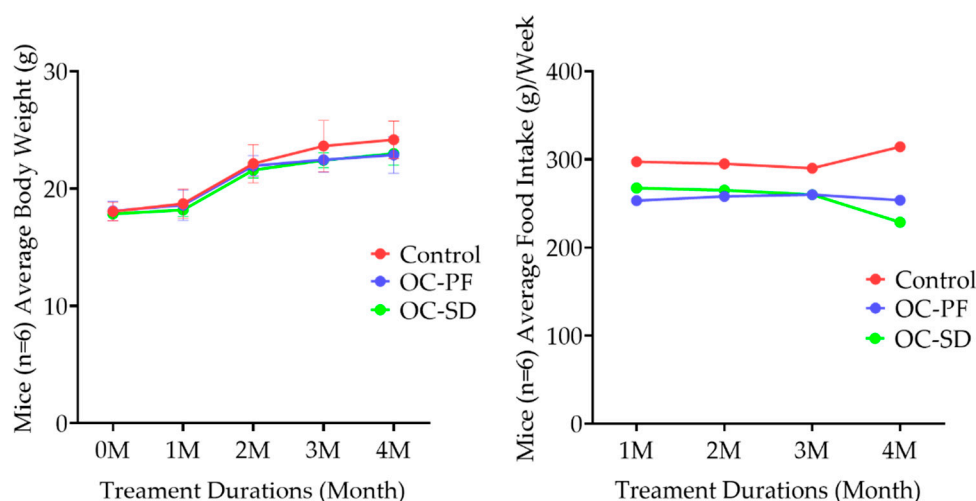

**Supplementary Figure S1.** The effects of OC-PF and OC-SD four-month treatments course in 5xFAD female mice body weight and food consumptions. **(A)** Average body weight of the control, OC-SD, and OC-PF-treated 5xFAD mice. **(B)** Average food intake per week of the control, OC-SD and OC-PF-treated 5xFAD mice.

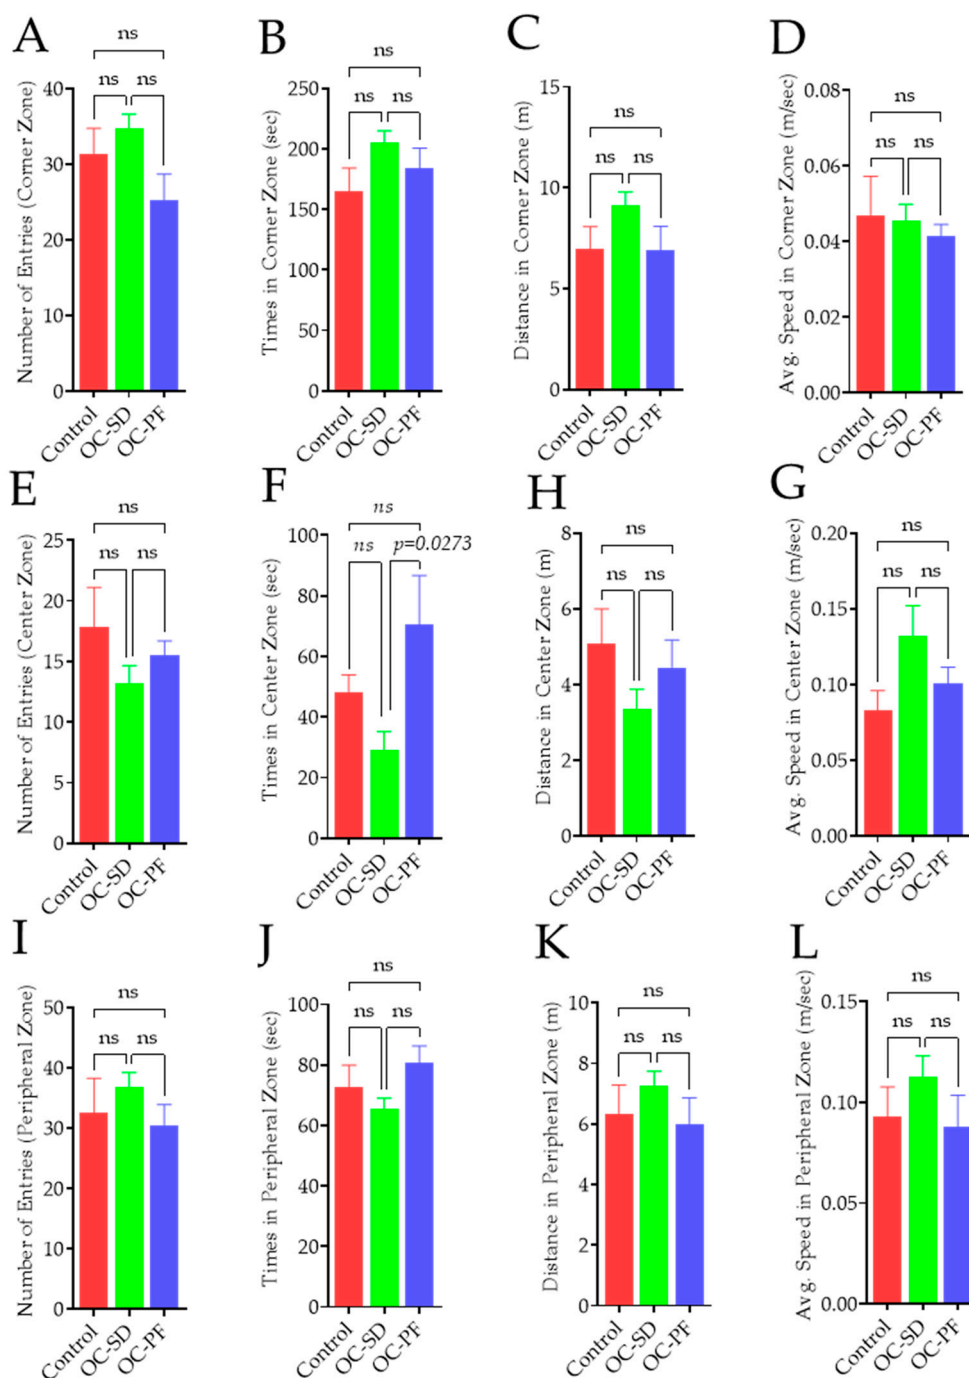

**Supplementary Figure S2. The effects of OC-PF and OC-SD four-month treatments course in 5xFAD female mice using the open field test for general exploration and anxiety. (A-D)** Number of entries to, time spent, distance travelled and average speed in the corner zone. **(E-H)** Number of entries to, time spent, distance travelled and average speed in the center zones. **(I-L)** Number of entries to, time spent, distance travelled and average speed in the peripheral zone. There was no effect of OC-SD and OC-PF in compared to control on the number of entries to, time spent and percentage distance travelled in the center zone. OC-PF spent more time in the center zone than OC-SD ( $p=0.0273$ ), but there was no effect of OC-SD and OC-PF in compared to control on time spent, number of entries and distance travelled in the

corner zones. There was no effect of OC-SD and OC-PF in compared to control on the number of entries to, time spent and distance travelled in the periphery zone. Individual datapoints are presented on the plot. Data are presented as mean  $\pm$  the standard error of mean (SEM). Data analyzed using One-way ANOVA followed by post-hoc Tukey test and presented as mean  $\pm$  SEM (n = 6 per group).

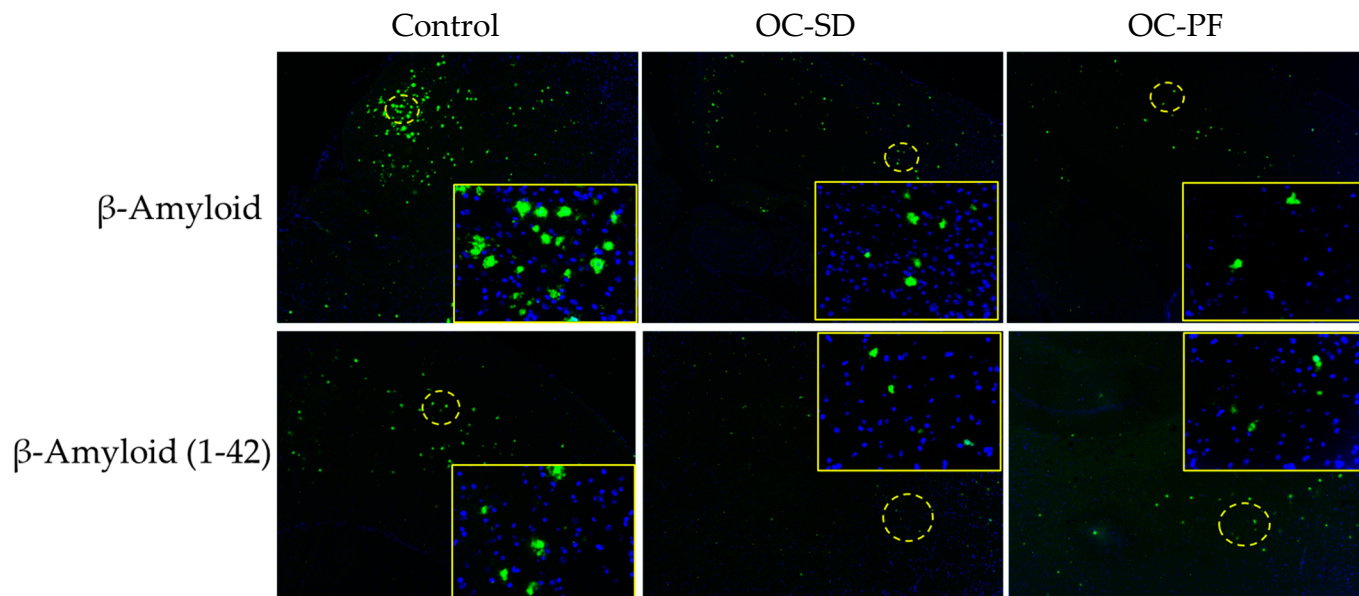

**Supplementary Figure S3.** Representative IHC photographs for 5xFAD female mice brain cortex sections (n = 4 mice/group) stained with A $\beta$  antibody (green) for the total A $\beta$  deposition and AB42. DAPI (blue) was used to stain the nuclei. Images are available at 4X and 40X (square) magnification for selected (circled) areas.
